# Supplementary figures and images for: Bronchus-associated macrophages efficiently capture and present soluble inhaled antigens and are capable of local Th2 cell activation
Source: eLife journal article supplement (doi:10.7554/elife.63296), 2022-09-12

Figure 2—figure supplement 3

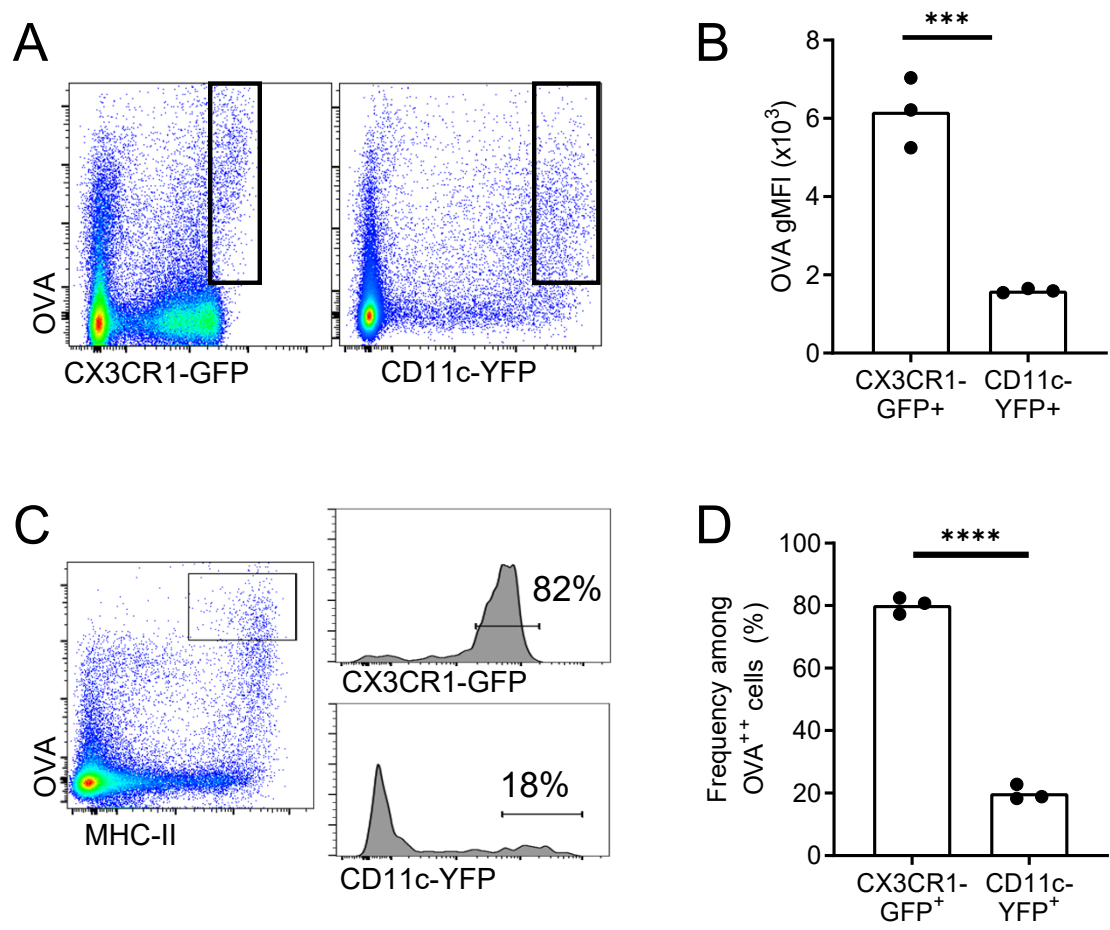

Supplement: supp [file elife-63296-supp-v1.zip]

Figure 2—figure supplement 2

A

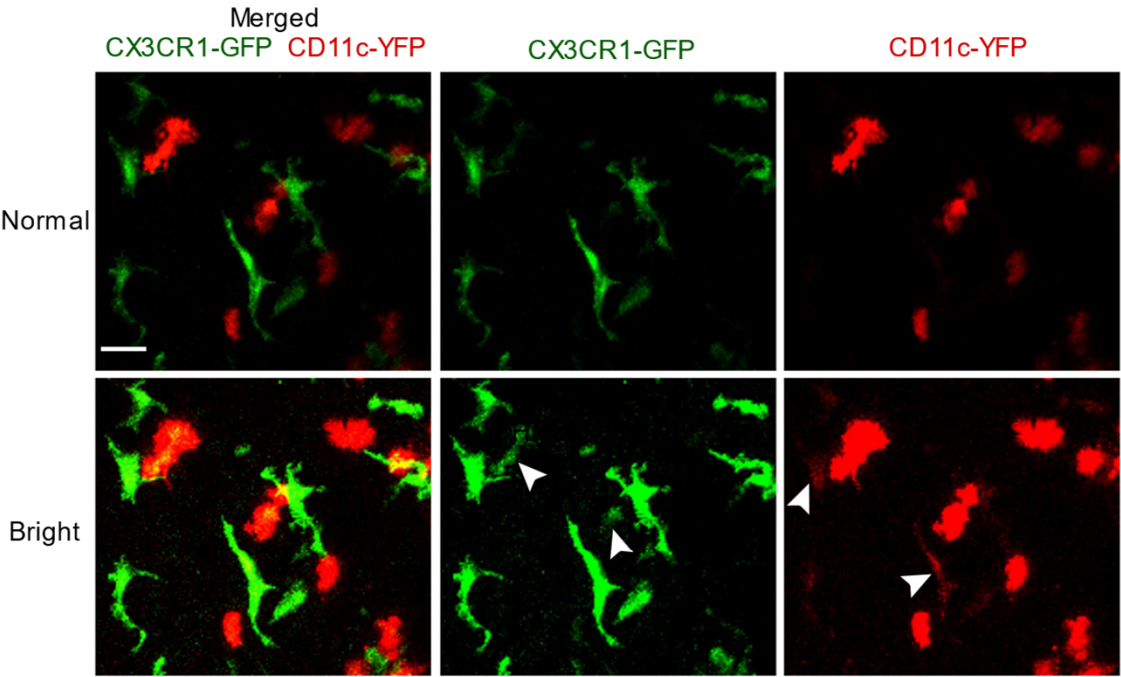

B

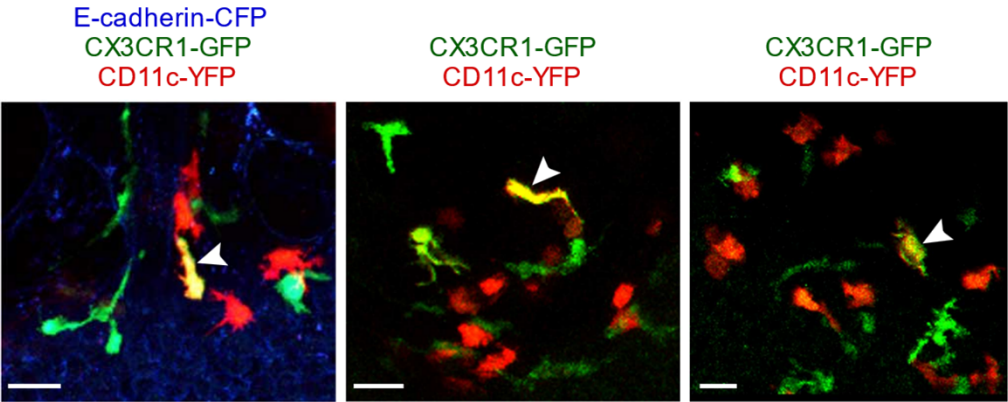

Supplement: supp [file elife-63296-supp-v1.zip]

Figure 3—figure supplement 1

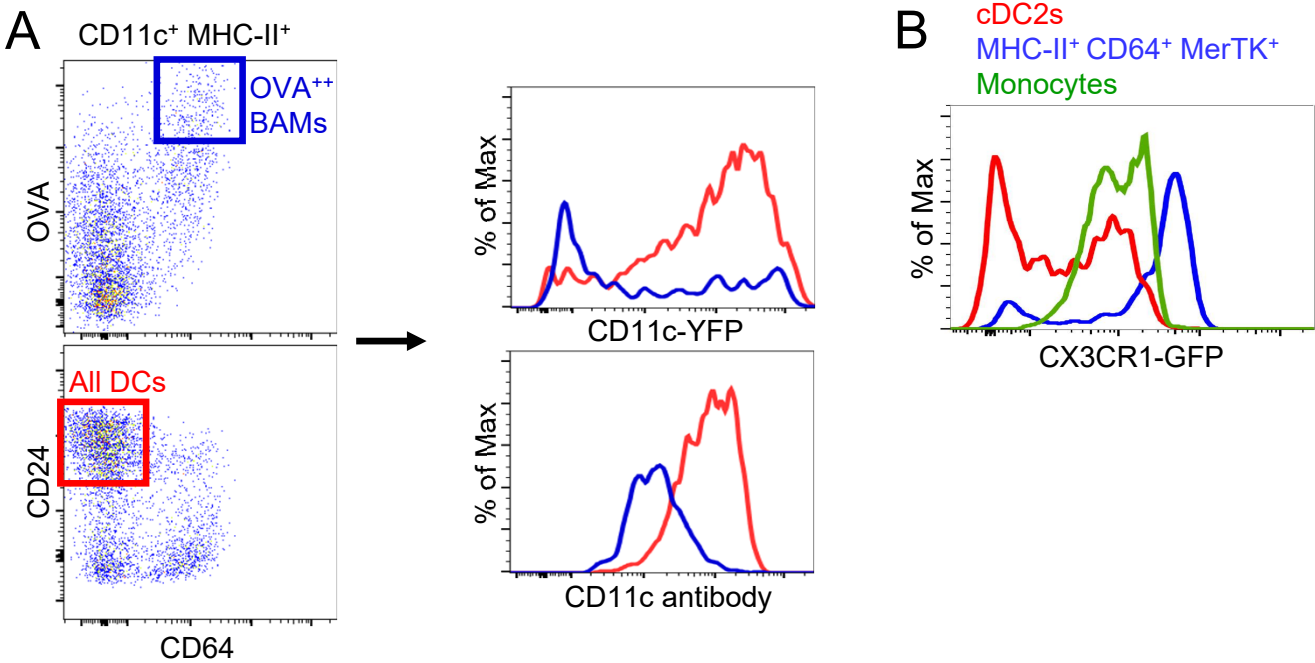

Supplement: supp [file elife-63296-supp-v1.zip]

**Figure 8—figure supplement 1**

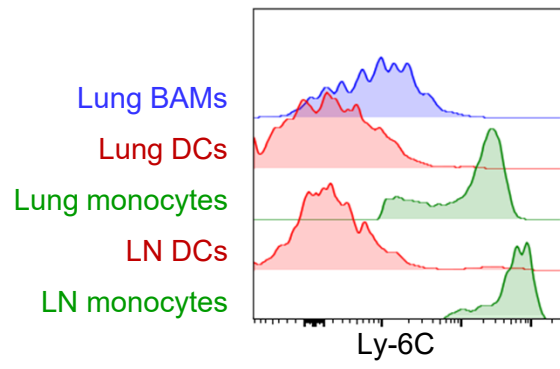

Supplement: supp [file elife-63296-supp-v1.zip]

**Figure 4—figure supplement 1**

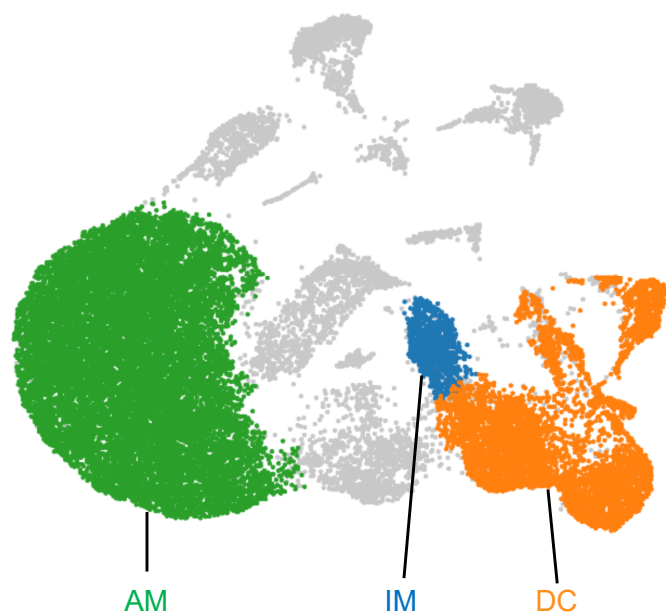

Supplement: supp [file elife-63296-supp-v1.zip]

**Figure 3—figure supplement 2**

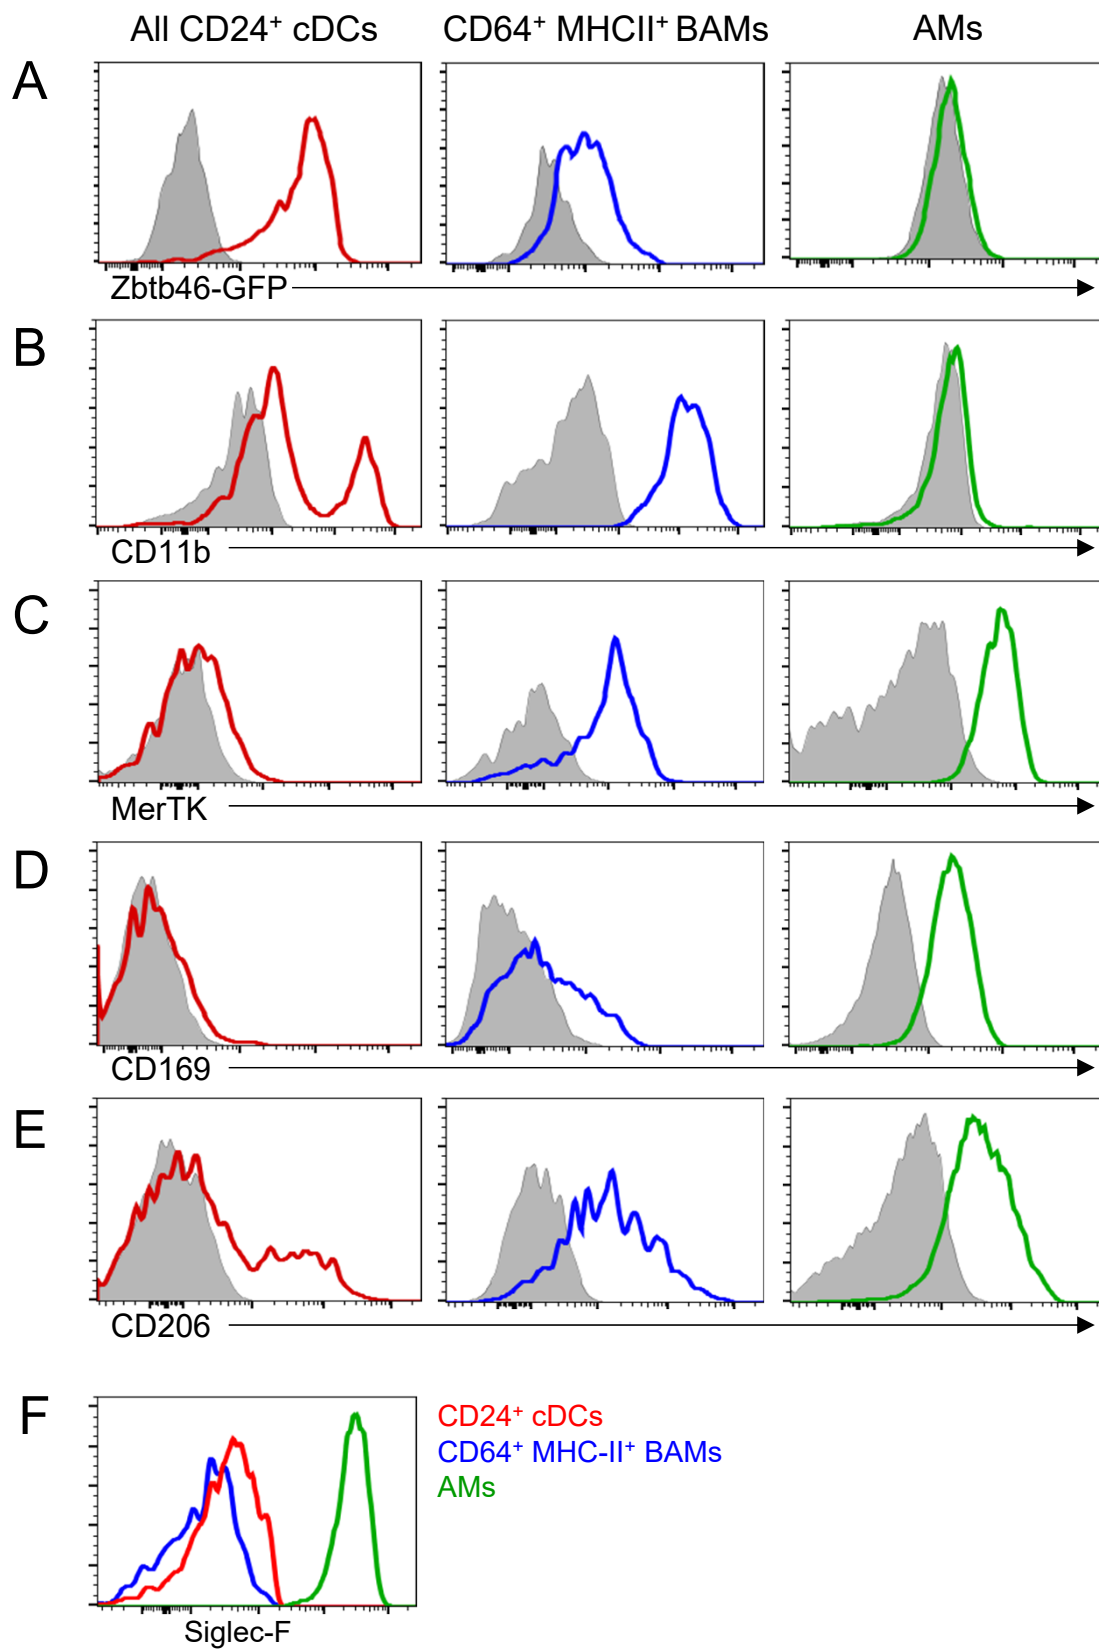

Supplement: supp [file elife-63296-supp-v1.zip]

Figure 2—figure supplement 1

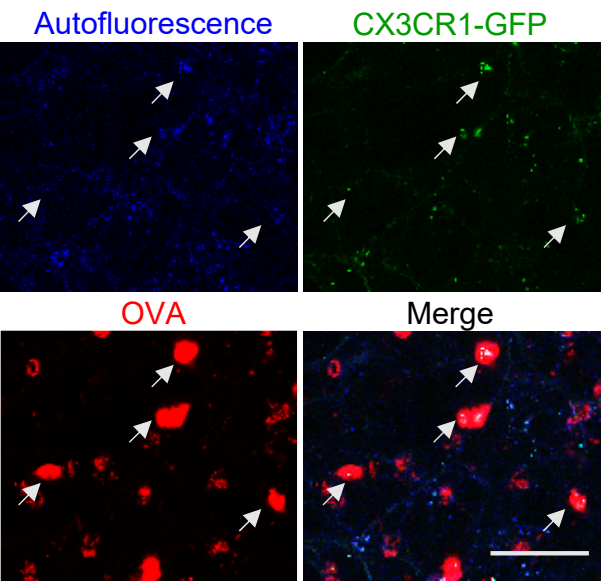

Supplement: supp [file elife-63296-supp-v1.zip]
